# Supplementary material for: Differential modulation of cognitive control networks by monetary reward and punishment
Source: PubMed Central journal article supplement — Soc Cogn Affect Neurosci. 2019 Jan 28;14(3):305–17. doi: 10.1093/scan/nsz006 (PMC6399610; doi:10.1093/scan/nsz006), 2019-01-28
Supplement: nsz006_supp.pdf [file nsz006_supp.pdf]

**Supplementary Table 1. Additional task performance measures**

| PERFORMANCE<br>VARIABLE     | REWARD HIGH   |        | REWARD LOW   |        | NEUTRAL       |        | PUNISHMENT LOW |        | PUNISHMENT HIGH |        |
|-----------------------------|---------------|--------|--------------|--------|---------------|--------|----------------|--------|-----------------|--------|
|                             | Repeat        | Switch | Repeat       | Switch | Repeat        | Switch | Repeat         | Switch | Repeat          | Switch |
| <b>Missed trials</b>        |               |        |              |        |               |        |                |        |                 |        |
| Mean (%)                    | 0.73          | 3.87   | 2.09         | 4.55   | 2.69          | 4.10   | 3.05           | 2.22   | 0.87            | 3.14   |
| (SD)                        | (1.57)        | (7.36) | (3.29)       | (9.18) | (3.51)        | (5.45) | (3.84)         | (4.34) | (2.11)          | (6.26) |
| <b>Accuracy Switch Cost</b> | 3.23 (11.38)  |        | 5.08 (13.07) |        | 4.75 (8.47)   |        | 1.68 (13.13)   |        | 3.31 (11.27)    |        |
| <b>RT Switch Cost</b>       | 0.055 (0.054) |        | 0.068 (0.07) |        | 0.063 (0.041) |        | 0.055 (0.046)  |        | 0.064 (0.052)   |        |

Accuracy switch cost is computed as the difference in percent correct responses on repeat minus switch trials.

RT switch cost is computed as the difference in response times for switch minus repeat trials in milliseconds.

**Supplementary Table 2. Regions showing greater activity on Switch versus Repeat trials under reward relative to punishment incentives in GLM-1.**

| Region                                                                                                                                                                                                                                                                                                                                                                                                                                                                                                                                             | Cluster Size | x; y; z      | TFCE T-stat |
|----------------------------------------------------------------------------------------------------------------------------------------------------------------------------------------------------------------------------------------------------------------------------------------------------------------------------------------------------------------------------------------------------------------------------------------------------------------------------------------------------------------------------------------------------|--------------|--------------|-------------|
| Paracingulate gyrus; cingulate Gyrus, anterior division; Frontal Pole; Superior Frontal Gyrus                                                                                                                                                                                                                                                                                                                                                                                                                                                      | 802          | -5; 46; 18   | 5.14        |
| Lingual gyrus, Cingulate gyrus posterior division; Precentral gyrus; Intracalcarine Cortex; Precuneous Cortex; Cuneal Cortex; Lingual Gyrus; Supracalcarine Cortex                                                                                                                                                                                                                                                                                                                                                                                 | 183          | 22; -48; 4   | 5.98        |
| Middle frontal gyrus; Inferior frontal gyrus pars opercularis; Inferior frontal gyrus pars triangularis; Precentral gyrus; Central Opercular Cortex                                                                                                                                                                                                                                                                                                                                                                                                | 132          | -50; 14; 40  | 5.5         |
| Middle frontal gyrus; Frontal Pole; Superior Frontal Gyrus; Inferior Frontal Gyrus, pars triangularis                                                                                                                                                                                                                                                                                                                                                                                                                                              | 113          | 22; 14; 40   | 4.62        |
| Juxtapositional Lobule Cortex (formerly Supplementary Motor Cortex); Cingulate Gyrus, anterior division; Cingulate Gyrus, posterior division; Precentral Gyrus; Paracingulate Gyrus                                                                                                                                                                                                                                                                                                                                                                | 91           | -10; 1; 47   | 4.43        |
| Superior Frontal Gyrus; Frontal Pole; Middle Frontal Gyrus                                                                                                                                                                                                                                                                                                                                                                                                                                                                                         | 26           | -17; 39; 36  | 5.29        |
| Middle Frontal Gyrus; Precentral Gyrus; Superior Frontal Gyrus                                                                                                                                                                                                                                                                                                                                                                                                                                                                                     | 22           | 27; 6; 43    | 3.6         |
| Frontal Pole; Frontal Orbital Cortex; Inferior Frontal Gyrus, pars triangularis                                                                                                                                                                                                                                                                                                                                                                                                                                                                    | 13           | 45; 39; -14  | 6.13        |
| Precentral Gyrus; Postcentral Gyrus                                                                                                                                                                                                                                                                                                                                                                                                                                                                                                                | 12           | -42; -13; 43 | 4.61        |
| Lingual Gyrus; Cingulate Gyrus, posterior division                                                                                                                                                                                                                                                                                                                                                                                                                                                                                                 | 8            | 12; -43; -7  | 4.25        |
| Angular Gyrus; Lateral Occipital Cortex, superior division; Middle Temporal Gyrus, temporooccipital part; Lateral Occipital Cortex, inferior division                                                                                                                                                                                                                                                                                                                                                                                              | 7            | -52; -58; 18 | 4.9         |
| Lateral Occipital Cortex, superior division; Angular Gyrus; Lateral Occipital Cortex, inferior division; Middle Temporal Gyrus, temporooccipital part                                                                                                                                                                                                                                                                                                                                                                                              | 6            | 52; -58; 22  | 3.73        |
| Lingual Gyrus; Occipital Fusiform Gyrus; Temporal Occipital Fusiform Cortex; Precuneous Cortex                                                                                                                                                                                                                                                                                                                                                                                                                                                     | 5            | -17; -56; -4 | 3.84        |
| Intracalcarine Cortex; Precuneous Cortex; Supracalcarine Cortex; Lingual Gyrus; Cuneal Cortex                                                                                                                                                                                                                                                                                                                                                                                                                                                      | 5            | -10; -73; 11 | 3.81        |
| Intracalcarine Cortex; Precuneous Cortex; Lingual Gyrus; Cingulate Gyrus, posterior division; Supracalcarine Cortex                                                                                                                                                                                                                                                                                                                                                                                                                                | 5            | -15; -61; 7  | 4.05        |
| Angular Gyrus; Supramarginal Gyrus, posterior division                                                                                                                                                                                                                                                                                                                                                                                                                                                                                             | 5            | 45; -51; 25  | 4.18        |
| All reported regions are significant at $p < 0.05$ after whole brain FWE correction at the voxel level and a cluster extent of 5 voxels. The FWE correction was based on 5000 permutations of the threshold free cluster enhancement (TFCE) values. The TFCE values and permutation-derived test statistics were calculated using the Randomise function implemented in FSL. All coordinates are listed in MNI space and represent the peaks of all clusters formed by contiguous voxels as well as peaks $> 20$ mm apart within the same cluster. |              |              |             |

**Supplementary Table 3. Regions showing increased activation for Low magnitude incentives relative to High magnitude incentives (independent of incentive value) in GLM-1**

| Region                                                                                                                                                                                                                                                                                                                                                                                                                                                                                                                                             | Cluster Size | x; y; z                                                                                                                                                                                                                                                                               | TFCE T-stat                                                                                                                                      |
|----------------------------------------------------------------------------------------------------------------------------------------------------------------------------------------------------------------------------------------------------------------------------------------------------------------------------------------------------------------------------------------------------------------------------------------------------------------------------------------------------------------------------------------------------|--------------|---------------------------------------------------------------------------------------------------------------------------------------------------------------------------------------------------------------------------------------------------------------------------------------|--------------------------------------------------------------------------------------------------------------------------------------------------|
| Occipital Pole; Intracalcarine Cortex; Lateral Occipital Cortex, inferior division; Occipital Fusiform Gyrus; Lateral Occipital Cortex, superior division; Precuneous Cortex; Cuneal Cortex; Lingual Gyrus; Supracalcarine Cortex                                                                                                                                                                                                                                                                                                                  | 4020         | -10; -96; -4<br><br>-10; 96; -4<br>20; -88; -7<br>-25; -96; 22<br>-25; -51; -4<br>22; -63; -7<br>-22; -78; -11<br>15; -91; 18<br>-7; -58; 14<br>22; -56; 14<br>-30; -73; 25<br>32; -83; 36<br>37; -73; 7<br>-47; -81; 14<br>-47; -61; 11<br>40; -86; -14<br>-2; -86; 36<br>15; -38; 0 | 9.04<br><br>9.04<br>7.51<br>7.11<br>6.95<br>5.94<br>5.92<br>5.53<br>4.98<br>4.57<br>4.55<br>4.49<br>4.39<br>4.37<br>4.13<br>4.08<br>3.74<br>3.74 |
| Temporal Pole; Frontal Orbital Cortex                                                                                                                                                                                                                                                                                                                                                                                                                                                                                                              | 150          | -30; 9; -32                                                                                                                                                                                                                                                                           | 5.63                                                                                                                                             |
| Parahippocampal Gyrus, anterior division; Left Hippocampus; Left Amygdala                                                                                                                                                                                                                                                                                                                                                                                                                                                                          | 90           | -25; -3; -22                                                                                                                                                                                                                                                                          | 4.68                                                                                                                                             |
| Precentral Gyrus; Postcentral Gyrus; Supramarginal Gyrus, anterior division                                                                                                                                                                                                                                                                                                                                                                                                                                                                        | 77           | -40; -16; 40                                                                                                                                                                                                                                                                          | 6.17                                                                                                                                             |
| Parahippocampal Gyrus, anterior division; Right Hippocampus; Right Amygdala                                                                                                                                                                                                                                                                                                                                                                                                                                                                        | 58           | 25; -13; -25                                                                                                                                                                                                                                                                          | 4.76                                                                                                                                             |
| Temporal Pole                                                                                                                                                                                                                                                                                                                                                                                                                                                                                                                                      | 53           | 50; 14; -32                                                                                                                                                                                                                                                                           | 4.39                                                                                                                                             |
| Postcentral Gyrus; Precentral Gyrus                                                                                                                                                                                                                                                                                                                                                                                                                                                                                                                | 26           | 57; -6; 32                                                                                                                                                                                                                                                                            | 5.01                                                                                                                                             |
| Precentral Gyrus; Postcentral Gyrus; Middle Frontal Gyrus                                                                                                                                                                                                                                                                                                                                                                                                                                                                                          | 24           | 40; -8; 61                                                                                                                                                                                                                                                                            | 4.5                                                                                                                                              |
| Subcallosal Cortex; Frontal Medial Cortex; Frontal Orbital Cortex                                                                                                                                                                                                                                                                                                                                                                                                                                                                                  | 16           | -7; 29; -18                                                                                                                                                                                                                                                                           | 4.11                                                                                                                                             |
| Superior Frontal Gyrus                                                                                                                                                                                                                                                                                                                                                                                                                                                                                                                             | 14           | -7; 21; 65                                                                                                                                                                                                                                                                            | 6.18                                                                                                                                             |
| Juxtapositional Lobule Cortex (formerly Supplementary Motor Cortex); Precentral Gyrus                                                                                                                                                                                                                                                                                                                                                                                                                                                              | 8            | 0; -8; 76                                                                                                                                                                                                                                                                             | 3.78                                                                                                                                             |
| Subcallosal Cortex; Frontal Orbital Cortex                                                                                                                                                                                                                                                                                                                                                                                                                                                                                                         | 7            | 5; 24; -22                                                                                                                                                                                                                                                                            | 3.95                                                                                                                                             |
| Temporal Pole; Planum Polare; Insular Cortex; Frontal Orbital Cortex                                                                                                                                                                                                                                                                                                                                                                                                                                                                               | 6            | -40; 4; -18                                                                                                                                                                                                                                                                           | 3.79                                                                                                                                             |
| All reported regions are significant at $p < 0.05$ after whole brain FWE correction at the voxel level and a cluster extent of 5 voxels. The FWE correction was based on 5000 permutations of the threshold free cluster enhancement (TFCE) values. The TFCE values and permutation-derived test statistics were calculated using the Randomise function implemented in FSL. All coordinates are listed in MNI space and represent the peaks of all clusters formed by contiguous voxels as well as peaks $> 20$ mm apart within the same cluster. |              |                                                                                                                                                                                                                                                                                       |                                                                                                                                                  |

**Supplementary Table 4. Regions showing increased activation for Low magnitude incentives relative to High magnitude incentives (independent of incentive valence) in GLM-2**

| Region                                                                                                                                                                                                                                                                                                                                                                                                                                                                                                                                             | Cluster Size | x; y; z       | TFCE T-stat |
|----------------------------------------------------------------------------------------------------------------------------------------------------------------------------------------------------------------------------------------------------------------------------------------------------------------------------------------------------------------------------------------------------------------------------------------------------------------------------------------------------------------------------------------------------|--------------|---------------|-------------|
| Lateral Occipital Cortex, superior division;                                                                                                                                                                                                                                                                                                                                                                                                                                                                                                       | 9829         | -10; -96; -14 | 11.7        |
| Lateral Occipital Cortex, inferior division;                                                                                                                                                                                                                                                                                                                                                                                                                                                                                                       |              |               |             |
| Intracalcarine Cortex; Lingual Gyrus;                                                                                                                                                                                                                                                                                                                                                                                                                                                                                                              |              | -10; -96; -4  | 11.7        |
| Occipital Fusiform Gyrus; Supracalcarine                                                                                                                                                                                                                                                                                                                                                                                                                                                                                                           |              | -22; -51; -4  | 9.83        |
| Cortex; Occipital Pole                                                                                                                                                                                                                                                                                                                                                                                                                                                                                                                             |              | -25; -96; 18  | 8.87        |
|                                                                                                                                                                                                                                                                                                                                                                                                                                                                                                                                                    |              | 22; -86; -7   | 8.66        |
|                                                                                                                                                                                                                                                                                                                                                                                                                                                                                                                                                    |              | 15; -96; 11   | 8.47        |
|                                                                                                                                                                                                                                                                                                                                                                                                                                                                                                                                                    |              | 27; -51; -7   | 7.57        |
|                                                                                                                                                                                                                                                                                                                                                                                                                                                                                                                                                    |              | -25; -78; -11 | 7.07        |
|                                                                                                                                                                                                                                                                                                                                                                                                                                                                                                                                                    |              | -7; 26; -18   | 6.76        |
|                                                                                                                                                                                                                                                                                                                                                                                                                                                                                                                                                    |              | 25; -83; 25   | 6.48        |
|                                                                                                                                                                                                                                                                                                                                                                                                                                                                                                                                                    |              | -7; -58; 14   | 6.48        |
|                                                                                                                                                                                                                                                                                                                                                                                                                                                                                                                                                    |              | 17; -61; 7    | 6.27        |
|                                                                                                                                                                                                                                                                                                                                                                                                                                                                                                                                                    |              | 25; 6; -25    | 6.06        |
|                                                                                                                                                                                                                                                                                                                                                                                                                                                                                                                                                    |              | -5; -26; -4   | 5.78        |
|                                                                                                                                                                                                                                                                                                                                                                                                                                                                                                                                                    |              | -42; -76; 25  | 5.71        |
|                                                                                                                                                                                                                                                                                                                                                                                                                                                                                                                                                    |              | 27; -13; -25  | 5.48        |
|                                                                                                                                                                                                                                                                                                                                                                                                                                                                                                                                                    |              | -22; -1; -25  | 5.15        |
|                                                                                                                                                                                                                                                                                                                                                                                                                                                                                                                                                    |              | -27; -23; -18 | 5.12        |
|                                                                                                                                                                                                                                                                                                                                                                                                                                                                                                                                                    |              | -37; 16; -32  | 5.08        |
|                                                                                                                                                                                                                                                                                                                                                                                                                                                                                                                                                    |              | 60; -1; -25   | 4.93        |
|                                                                                                                                                                                                                                                                                                                                                                                                                                                                                                                                                    |              | -37; 4; 0     | 4.78        |
| Postcentral Gyrus; Precentral Gyrus;                                                                                                                                                                                                                                                                                                                                                                                                                                                                                                               | 222          | -32; -18; 57  | 5.33        |
| Supramarginal Gyrus, anterior division                                                                                                                                                                                                                                                                                                                                                                                                                                                                                                             |              |               |             |
| Frontal Operculum Cortex; Insular Cortex;                                                                                                                                                                                                                                                                                                                                                                                                                                                                                                          | 43           | -40; 24; 0    | 5.2         |
| Frontal Orbital Cortex; Inferior Frontal                                                                                                                                                                                                                                                                                                                                                                                                                                                                                                           |              |               |             |
| Gyrus, pars triangularis; Inferior Frontal                                                                                                                                                                                                                                                                                                                                                                                                                                                                                                         |              |               |             |
| Gyrus, pars opercularis                                                                                                                                                                                                                                                                                                                                                                                                                                                                                                                            |              |               |             |
| All reported regions are significant at $p < 0.05$ after whole brain FWE correction at the voxel level and a cluster extent of 5 voxels. The FWE correction was based on 5000 permutations of the threshold free cluster enhancement (TFCE) values. The TFCE values and permutation-derived test statistics were calculated using the Randomise function implemented in FSL. All coordinates are listed in MNI space and represent the peaks of all clusters formed by contiguous voxels as well as peaks $> 20$ mm apart within the same cluster. |              |               |             |

**Supplementary Table 5. Associations between brain activation and reward and punishment sensitivity**

| Region                                                                                                                                                                                                                                                                                                                                                                                                                                                                                                                                                                                                                                                                                | Cluster Size | x; y; z     | TFCE T-stat |
|---------------------------------------------------------------------------------------------------------------------------------------------------------------------------------------------------------------------------------------------------------------------------------------------------------------------------------------------------------------------------------------------------------------------------------------------------------------------------------------------------------------------------------------------------------------------------------------------------------------------------------------------------------------------------------------|--------------|-------------|-------------|
| <b>Positive correlations between BAS-Drive and RH (S&gt;R) &gt; RL (S&gt;R)</b>                                                                                                                                                                                                                                                                                                                                                                                                                                                                                                                                                                                                       |              |             |             |
| Frontal Pole; Paracingulate Gyrus; Superior Frontal Gyrus                                                                                                                                                                                                                                                                                                                                                                                                                                                                                                                                                                                                                             | 3            | -5; 61; 7   | 5.98        |
| <b>Negative correlations between BIS and PH (S&gt;R) &gt; PL (S&gt;R)</b>                                                                                                                                                                                                                                                                                                                                                                                                                                                                                                                                                                                                             |              |             |             |
| Frontal Pole; Inferior Frontal Gyrus, pars triangularis; Frontal Orbital Cortex                                                                                                                                                                                                                                                                                                                                                                                                                                                                                                                                                                                                       | 40           | -47; 44; -7 | 6.15        |
| <p>All reported regions are significant at <math>p &lt; 0.05</math> after whole brain FWE correction at the voxel level. The FWE correction was based on 5000 permutations of the threshold free cluster enhancement (TFCE) values. The TFCE values and permutation-derived test statistics were calculated using the Randomise function implemented in FSL. All coordinates are listed in MNI space and represent the peaks of all clusters formed by contiguous voxels as well as peaks &gt; 20 mm apart within the same cluster.<br/>           RH = Reward high; RL = Reward low; PH = Punishment high; PL = Punishment low; S&gt;R = contrast of switch minus repeat trials.</p> |              |             |             |

**Supplementary Table 6. Regions showing BOLD activity associated with longer reaction times in GLM-1s**

| Region                                                                                                                                                                                                                                                                                                                                                                                                                                    | Cluster Size | x; y; z                                                                                                                                                                                                                                                                                                  | TFCE T-stat                                                                                                                                                         |
|-------------------------------------------------------------------------------------------------------------------------------------------------------------------------------------------------------------------------------------------------------------------------------------------------------------------------------------------------------------------------------------------------------------------------------------------|--------------|----------------------------------------------------------------------------------------------------------------------------------------------------------------------------------------------------------------------------------------------------------------------------------------------------------|---------------------------------------------------------------------------------------------------------------------------------------------------------------------|
| <b>A) Positive correlations: increased activation with longer RTs</b>                                                                                                                                                                                                                                                                                                                                                                     |              |                                                                                                                                                                                                                                                                                                          |                                                                                                                                                                     |
| Inferior Frontal Gyrus, pars opercularis;<br>Middle Frontal Gyrus; Precentral Gyrus;<br>Frontal Pole; Cingulate Gyrus, anterior<br>division; Paracingulate Gyrus; Superior<br>Frontal Gyrus; Insular Cortex; Cingulate<br>Gyrus, posterior division; Precuneous Cortex;<br>Frontal Orbital Cortex; Inferior Frontal<br>Gyrus, pars triangularis; Juxtapositional<br>Lobule Cortex (formerly Supplementary<br>Motor Cortex); Temporal Pole | 4788         | 45; 14; 29<br><br>45; 14; 29<br>0; 19; 40<br>35; 6.5; 7<br>32; 21; -11<br>-2; -41; 47<br>57; -1; 7<br>35; 39; 0<br>47; 41; 18<br>5; 39; 40<br>22; 16; 54<br>7; 26; 22<br>5; 24; 61<br>-2; 46; 22<br>-12; -23; 36<br>-12; -58; 68<br>57; 24; 11<br>25; 51; 25<br>2; -11; 72<br>15; -48; 36<br>10; -38; 79 | 7.39<br><br>7.39<br>6.74<br>6.01<br>5.83<br>5.8<br>5.48<br>5.42<br>5.25<br>5.07<br>4.92<br>4.6<br>4.49<br>4.39<br>4.37<br>4.3<br>4.04<br>3.9<br>3.9<br>3.89<br>3.78 |
| Inferior Frontal Gyrus, pars opercularis;<br>Middle Frontal Gyrus; Frontal Orbital Cortex;<br>Frontal Pole; Thalamus; Precentral Gyrus;<br>Temporal Pole; Inferior Frontal Gyrus, pars<br>triangularis; Insular Cortex; Frontal<br>Operculum Cortex; Caudate                                                                                                                                                                              | 1937         | -40; 19; 22<br><br>-40; 19; 22<br>10; -11; -7<br>-32; 14; -25<br>10; 4; 7<br>-27; 19; 4<br>-40; 41; 4<br>-10; -3; 11<br>-52; 6; 36<br>-47; 21; -4<br>17; 24; 0<br>-12; 16; -11                                                                                                                           | 7<br><br>7<br>5.84<br>5.61<br>5.54<br>5.4<br>5.09<br>5.05<br>4.48<br>4.34<br>3.82<br>3.69                                                                           |
| Supramarginal Gyrus, anterior division;<br>Supramarginal Gyrus, posterior division;<br>Angular Gyrus; Postcentral Gyrus; Superior<br>Parietal Lobule                                                                                                                                                                                                                                                                                      | 282          | 55; -33; 50                                                                                                                                                                                                                                                                                              | 5.61                                                                                                                                                                |
| Lateral Occipital Cortex, superior division;<br>Angular Gyrus                                                                                                                                                                                                                                                                                                                                                                             | 189          | 42; -73; 36                                                                                                                                                                                                                                                                                              | 5.35                                                                                                                                                                |
| Middle Frontal Gyrus                                                                                                                                                                                                                                                                                                                                                                                                                      | 7            | -27; 16; 32                                                                                                                                                                                                                                                                                              | 3.2                                                                                                                                                                 |
| Temporal Pole; Temporal Fusiform Cortex,<br>anterior division; Parahippocampal Gyrus,<br>anterior division                                                                                                                                                                                                                                                                                                                                | 6            | -35; 4; -32                                                                                                                                                                                                                                                                                              | 3.91                                                                                                                                                                |
| <b>B) Negative correlations: increased activation with shorter RTs</b>                                                                                                                                                                                                                                                                                                                                                                    |              |                                                                                                                                                                                                                                                                                                          |                                                                                                                                                                     |
| Occipital Pole; Lingual Gyrus; Lateral<br>Occipital Cortex, inferior division; Occipital<br>Fusiform Gyrus; Intracalcarine Cortex;<br>Lateral Occipital Cortex, superior division                                                                                                                                                                                                                                                         | 465          | 17; -88; 0                                                                                                                                                                                                                                                                                               | 6.96                                                                                                                                                                |
| Occipital Pole; Occipital Fusiform Gyrus;<br>Lingual Gyrus; Lateral Occipital Cortex,<br>inferior division                                                                                                                                                                                                                                                                                                                                | 357          | -12; -104; 7                                                                                                                                                                                                                                                                                             | 6.42                                                                                                                                                                |

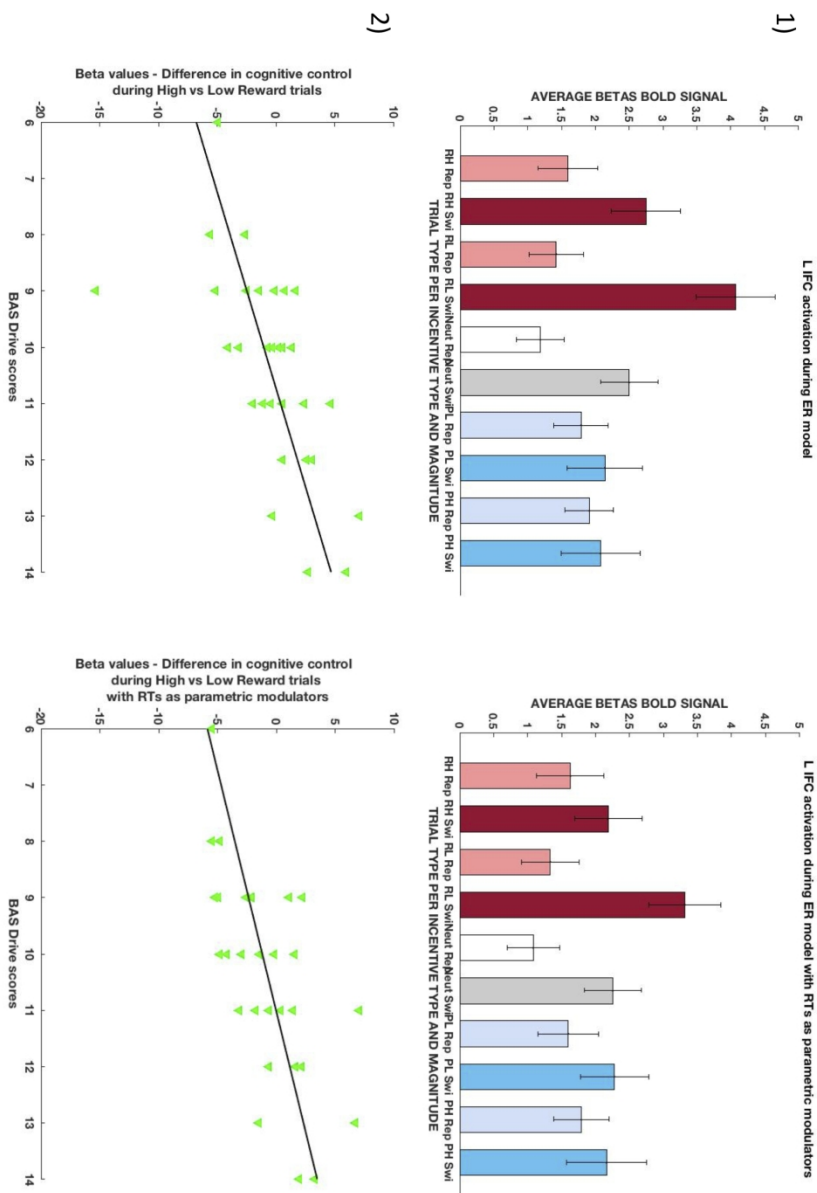

Supplementary Figure 1. Results comparison from models GLM-1 and GLM-1s. The left column shows the results from the original model and the right shows results from a supplemental model including response times as a parametric regressor for all trials. 1) Comparison between the average Beta coefficients for each trial type and magnitude in the left inferior frontal voxels that show a conjunction of: (a) increased activation in Switch vs Repeat trials; (b) increased activation in Reward vs Punishment trials during cognitive control and (c) increased functional connectivity with vStr PPI seed. This region is circled in blue in Figure 3. 2) Comparison of the scatterplot of Beta coefficients for the high vs low reward under cognitive control contrast and BAS drive scores.

167x230mm (300 x 300 DPI)

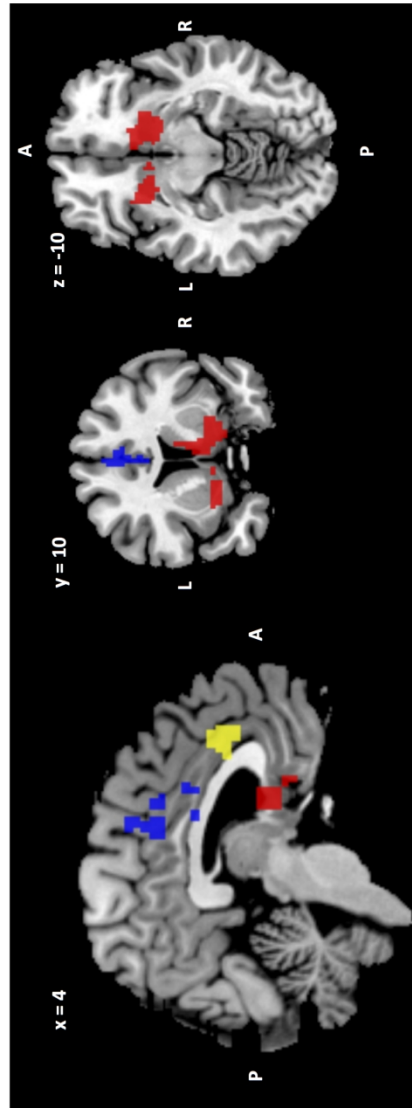

Supplementary Figure 2. Clusters taken as seed regions for Psychophysiological (PPI) analyses. Voxels in yellow depict the mask of the dACC from the value effects, voxels in blue depict the mask of the dACC from the magnitude effects; voxels in red depict the mask of the vStr from the magnitude effects.

209x297mm (300 x 300 DPI)



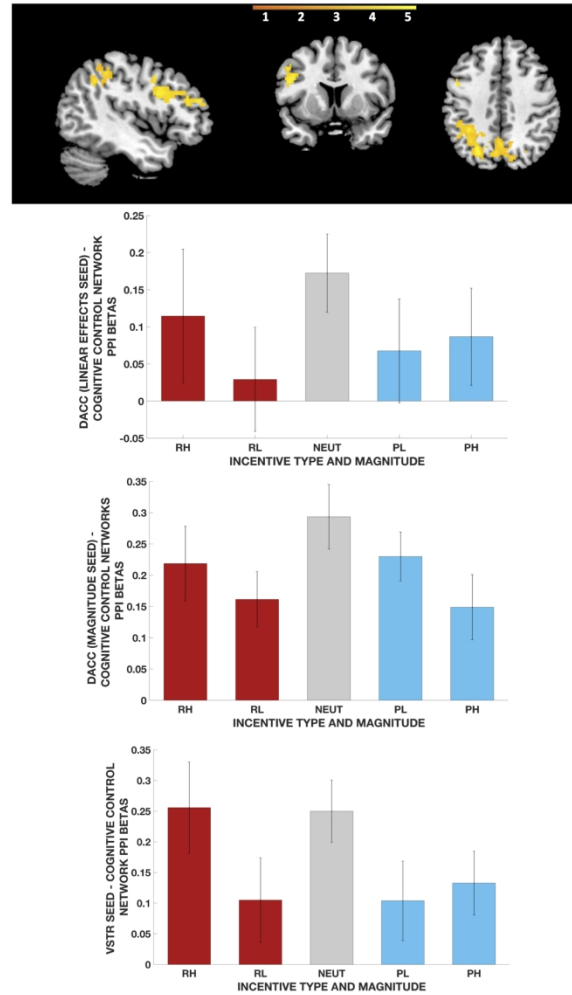

Supplementary Figure 3. Beta coefficients for each of the three PPI analyses showing functional connectivity between each seed region and cognitive control regions. (a) shows the regions of increased activation during switch relative to repeat trials across all incentive types (b) shows the Betas for the functional connectivity analysis between each of the three seed regions and the cognitive control regions shown in (a).

209x297mm (300 x 300 DPI)
